# Supplementary material for: The Contribution of Density Functional Theory to the Atomistic Knowledge of Electrochromic Processes
Source: MDPI journal article supplement (doi:10.3390/molecules26195793), 2021-09-24
Supplement: s1 [file s1]

## **Supporting Information**

# **The contribution of density functional theory to the atomistic knowledge of electrochromic processes**

**Bruna Clara De Simone<sup>1</sup>, Marta Erminia Alberto<sup>1</sup>, Tiziana Marino<sup>1</sup>, Nino Russo<sup>1\*</sup>, Marirosa Toscano<sup>1</sup>**

Dipartimento di Chimica e Tecnologie Chimiche, Università della Calabria, Rende (CS), Italy

\*Correspondence: [nrusso@unical.it](mailto:nrusso@unical.it);

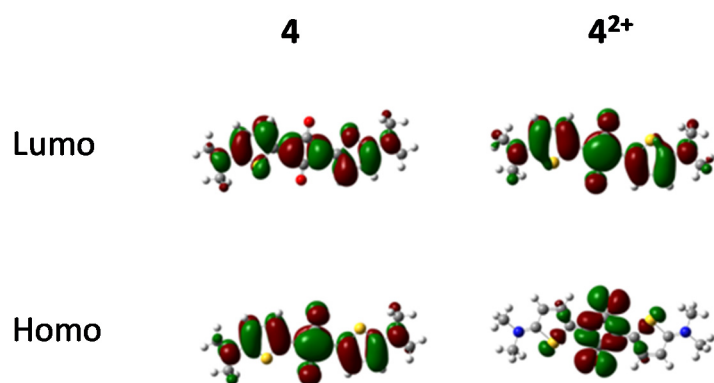

Figure S1. Plots of the molecular orbitals involved in the transitions for **4** and **4<sup>2+</sup>**

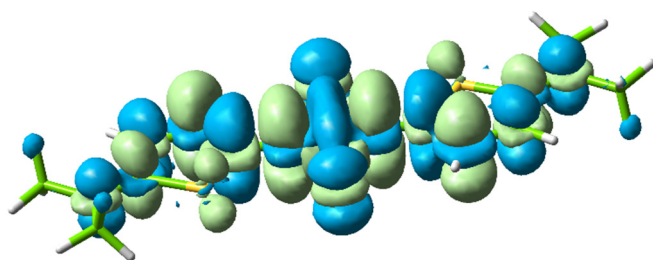

Figure S2. Computed density difference plot for molecule **4** with the first excited state considered (isodensity 0.000400 a.u.), the blue (green) regions indicating decrease (increase) in the electronic density upon electronic transition.

Table S1. Cartesian coordinates and total energies (in Hartree) for the optimized geometries (B3LYP/ 6- 31+G\* )

1

Energy = -1143.84510063

| Atom | Coordinates (Angstroms) |             |             |
|------|-------------------------|-------------|-------------|
|      | X                       | Y           | Z           |
| C    | 0.22349600              | 3.69967600  | -0.99758400 |
| C    | -1.02447100             | 4.05543700  | -0.54563000 |
| C    | -1.93559800             | 3.07580200  | -0.07164800 |
| C    | -1.57372400             | 1.67946300  | -0.11202000 |
| C    | -0.20621000             | 1.33604000  | -0.42045000 |
| C    | 0.63107200              | 2.35828200  | -0.88107200 |
| C    | -3.19326500             | 3.48943100  | 0.43774000  |
| C    | -4.09273900             | 2.55631800  | 0.88881700  |
| C    | -3.80067700             | 1.18849100  | 0.73127000  |
| C    | -2.60603800             | 0.72321400  | 0.17919500  |
| C    | 0.63809000              | -2.35451600 | 0.88425400  |
| C    | -0.20212400             | -1.33520600 | 0.42251000  |
| C    | -1.56831100             | -1.68315300 | 0.11328200  |
| C    | -1.92563500             | -3.08066700 | 0.07316500  |
| C    | -1.01179800             | -4.05711700 | 0.54850200  |
| C    | 0.23464200              | -3.69710700 | 1.00133100  |
| C    | -2.60346900             | -0.73035000 | -0.17913000 |
| C    | -3.79603400             | -1.19966300 | -0.73225200 |
| C    | -4.08347100             | -2.56849000 | -0.88968200 |
| C    | -3.18146100             | -3.49853300 | -0.43732100 |
| B    | 0.49202700              | 0.00141200  | 0.00075500  |
| C    | 2.08752700              | 0.00306400  | -0.00017800 |
| C    | 2.81110500              | -0.45432700 | -1.12549400 |
| C    | 4.21061400              | -0.43852400 | -1.11354700 |
| C    | 4.93340700              | 0.00953800  | -0.00426700 |
| C    | 4.21171800              | 0.45952900  | 1.10513900  |
| C    | 2.81231100              | 0.46619500  | 1.12218500  |
| C    | 2.08685600              | 0.97492300  | 2.35158200  |
| C    | 6.44470000              | -0.01564000 | 0.00537500  |
| C    | 2.08450700              | -0.95833300 | -2.35616200 |
| H    | 0.91280800              | 4.44891300  | -1.37689000 |
| H    | -1.33733100             | 5.09718500  | -0.53810000 |
| H    | 1.66152300              | 2.11567800  | -1.11799300 |
| H    | -3.41704100             | 4.55256000  | 0.47865900  |
| H    | -5.04058100             | 2.85782700  | 1.32573400  |
| H    | -4.54847500             | 0.46325100  | 1.03421800  |
| H    | 1.66760500              | -2.10846100 | 1.12168600  |
| H    | -1.32130500             | -5.09986900 | 0.54126400  |
| H    | 0.92599100              | -4.44394800 | 1.38166200  |
| H    | -4.54591300             | -0.47694300 | -1.03608100 |
| H    | -5.02987200             | -2.87322400 | -1.32748400 |
| H    | -3.40177500             | -4.56239200 | -0.47806800 |
| H    | 4.74936700              | -0.78690800 | -1.99358900 |
| H    | 4.75141200              | 0.81938900  | 1.98002400  |
| H    | 2.79064500              | 1.24350200  | 3.14606200  |
| H    | 1.39881600              | 0.22207100  | 2.75675700  |
| H    | 1.48518500              | 1.86375700  | 2.12395700  |
| H    | 6.85415000              | 0.09715600  | -1.00441800 |
| H    | 6.82673900              | -0.96487300 | 0.40537800  |
| H    | 6.85561100              | 0.78563500  | 0.62935800  |

|   |            |             |             |
|---|------------|-------------|-------------|
| H | 1.39630900 | -0.20414500 | -2.75857200 |
| H | 1.48280900 | -1.84772100 | -2.13073200 |
| H | 2.78760200 | -1.22486100 | -3.15194500 |

2

Energy = -2340.02642946

| Atom | Coordinates (Angstroms) |  |  |
|------|-------------------------|--|--|
|------|-------------------------|--|--|

|   | X           | Y          | Z           |
|---|-------------|------------|-------------|
| S | 6.87780500  | 4.53508700 | 5.30567200  |
| S | 4.75721900  | 4.48588600 | 5.08176100  |
| C | 7.21229400  | 3.75738900 | 3.73288100  |
| C | 8.43155300  | 3.30895500 | 3.32529400  |
| C | 9.70982900  | 3.37842600 | 4.04795600  |
| C | 10.05926500 | 4.52186500 | 4.78855100  |
| H | 9.40771500  | 5.39079900 | 4.78686300  |
| C | 11.26452900 | 4.57823300 | 5.48623100  |
| H | 11.50979000 | 5.47718600 | 6.04616800  |
| C | 12.17001400 | 3.50978700 | 5.46344300  |
| C | 11.82790100 | 2.37849200 | 4.70616400  |
| H | 12.51309200 | 1.53527400 | 4.66493700  |
| C | 10.62503000 | 2.30837900 | 4.01150000  |
| H | 10.38240700 | 1.40837900 | 3.45366500  |
| S | 6.38088700  | 2.74496500 | 1.36431700  |
| S | 8.46987200  | 2.53940000 | 1.71533600  |
| C | 6.03077800  | 3.51850800 | 2.93199900  |
| C | 4.78821400  | 3.76239200 | 3.44133700  |
| C | 3.48811400  | 3.47356200 | 2.83071300  |
| C | 2.38344000  | 3.09550100 | 3.62401100  |
| H | 2.49602400  | 3.00410600 | 4.69963400  |
| C | 1.15564600  | 2.80172400 | 3.04941500  |
| H | 0.32117400  | 2.50003700 | 3.67349800  |
| C | 0.99367600  | 2.88463000 | 1.65452900  |
| C | 2.07830800  | 3.27590600 | 0.85186700  |
| H | 1.95425900  | 3.36148100 | -0.22241500 |
| C | 3.30291200  | 3.57282700 | 1.43614200  |
| H | 4.10840500  | 3.92857500 | 0.80239100  |
| C | 13.46379200 | 3.56214300 | 6.23908600  |
| H | 13.37287700 | 3.02392400 | 7.19185200  |
| H | 14.28307000 | 3.09478500 | 5.68226100  |
| H | 13.75014100 | 4.59261500 | 6.47088600  |
| C | -0.27113500 | 2.58044700 | 1.05719300  |
| N | -1.29977600 | 2.33257800 | 0.57148900  |

3

Energy = -575.15731303

| Atom | Coordinates (Angstroms) |  |  |
|------|-------------------------|--|--|
|------|-------------------------|--|--|

|   | X          | Y           | Z           |
|---|------------|-------------|-------------|
| C | 2.85611900 | 1.18649000  | -0.05666200 |
| C | 1.50512400 | 1.21298700  | -0.04915500 |
| C | 0.69235800 | -0.00001800 | -0.04797200 |
| C | 1.50517500 | -1.21299400 | -0.04970100 |
| C | 2.85616600 | -1.18645600 | -0.05728300 |
| H | 3.45282800 | 2.09303200  | -0.05849400 |

|   |             |             |             |
|---|-------------|-------------|-------------|
| H | 1.03242500  | 2.18864700  | -0.05506900 |
| H | 1.03249000  | -2.18865400 | -0.05641100 |
| H | 3.45290800  | -2.09297800 | -0.05960900 |
| C | -0.69228400 | -0.00004000 | -0.04780200 |
| C | -1.50508800 | -1.21302600 | -0.04879000 |
| C | -1.50506800 | 1.21295800  | -0.04934500 |
| C | -2.85609500 | -1.18647900 | -0.05604000 |
| H | -1.03243300 | -2.18870200 | -0.05468200 |
| C | -2.85607000 | 1.18646200  | -0.05667500 |
| H | -1.03235700 | 2.18860500  | -0.05603500 |
| H | -3.45283400 | -2.09299900 | -0.05767700 |
| H | -3.45280700 | 2.09298200  | -0.05879800 |
| N | -3.58663800 | -0.00002500 | -0.09656900 |
| N | 3.58677600  | 0.00003800  | -0.09745900 |
| C | 4.99488700  | 0.00000800  | 0.24833300  |
| H | 5.16923800  | -0.00015100 | 1.33650400  |
| H | 5.47701400  | -0.88561700 | -0.17757300 |
| H | 5.47700100  | 0.88575900  | -0.17732500 |
| C | -4.99519900 | 0.00006200  | 0.24721000  |
| H | -5.17110000 | 0.00018700  | 1.33513100  |
| H | -5.47670200 | 0.88572400  | -0.17932300 |
| H | -5.47678500 | -0.88564300 | -0.17914800 |

3+

Energy = -575.04333852

**Atom** **Coordinates (Angstroms)**

|   | X           | Y           | Z           |
|---|-------------|-------------|-------------|
| C | 2.85744200  | 1.17837300  | -0.01227600 |
| C | 1.49198500  | 1.20406200  | -0.01177300 |
| C | 0.71605100  | 0.00000100  | -0.01062100 |
| C | 1.49193200  | -1.20408600 | -0.01197200 |
| C | 2.85739800  | -1.17845500 | -0.01247100 |
| H | 3.45281700  | 2.08353700  | -0.01192800 |
| H | 1.02073800  | 2.17858000  | -0.01575200 |
| H | 1.02064700  | -2.17858600 | -0.01615000 |
| H | 3.45271400  | -2.08365500 | -0.01226500 |
| C | -0.71605100 | 0.00002800  | -0.01058900 |
| C | -1.49196200 | -1.20404600 | -0.01171500 |
| C | -1.49195500 | 1.20410300  | -0.01191400 |
| C | -2.85742000 | -1.17838300 | -0.01223400 |
| H | -1.02069200 | -2.17855400 | -0.01565000 |
| C | -2.85742000 | 1.17844600  | -0.01242700 |
| H | -1.02069200 | 2.17861200  | -0.01604800 |
| H | -3.45277600 | -2.08355900 | -0.01187700 |
| H | -3.45275500 | 2.08363400  | -0.01221800 |
| N | -3.55798000 | 0.00003900  | -0.01725300 |
| N | 3.55798200  | -0.00006300 | -0.01726700 |
| C | 5.02492800  | 0.00005300  | 0.05519600  |
| H | 5.35852600  | 0.00219300  | 1.09807200  |
| H | 5.41181000  | -0.88818300 | -0.44721700 |
| H | 5.41192600  | 0.88614600  | -0.45094100 |
| C | -5.02493000 | -0.00006300 | 0.05512500  |
| H | -5.35857900 | -0.00156700 | 1.09798500  |

|   |             |             |             |
|---|-------------|-------------|-------------|
| H | -5.41181600 | 0.88784700  | -0.44786800 |
| H | -5.41186900 | -0.88648500 | -0.45047500 |

32+

Energy = -574.87859060

| Atom | Coordinates (Angstroms) |             |             |
|------|-------------------------|-------------|-------------|
|      | X                       | Y           | Z           |
| C    | 2.85427300              | 1.10622100  | 0.40198600  |
| C    | 1.46903500              | 1.13033500  | 0.41005500  |
| C    | 0.74448600              | 0.00114300  | -0.00379800 |
| C    | 1.47301300              | -1.12590300 | -0.41887800 |
| C    | 2.85745300              | -1.09549400 | -0.41501800 |
| H    | 3.45085900              | 1.95241100  | 0.72274300  |
| H    | 0.97369100              | 2.02785500  | 0.76413000  |
| H    | 0.98026100              | -2.02358200 | -0.77615400 |
| H    | 3.45795600              | -1.93877400 | -0.73682000 |
| C    | -0.74448600             | -0.00112100 | -0.00380300 |
| C    | -1.46904500             | -1.13031700 | 0.41005100  |
| C    | -1.47300400             | 1.12592100  | -0.41888300 |
| C    | -2.85427400             | -1.10619600 | 0.40197200  |
| H    | -0.97370300             | -2.02783700 | 0.76412900  |
| C    | -2.85745300             | 1.09552200  | -0.41502600 |
| H    | -0.98024900             | 2.02359800  | -0.77616200 |
| H    | -3.45087900             | -1.95237600 | 0.72272700  |
| H    | -3.45793500             | 1.93881300  | -0.73682600 |
| N    | -3.52898700             | -0.00713700 | -0.00750000 |
| N    | 3.52898700              | 0.00717100  | -0.00748100 |
| C    | 5.01974900              | -0.00763600 | 0.02375700  |
| H    | 5.34911600              | -0.45740400 | 0.96385600  |
| H    | 5.38560200              | -0.58996000 | -0.82224300 |
| H    | 5.38617500              | 1.01576300  | -0.05167700 |
| C    | -5.01974800             | 0.00753100  | 0.02377600  |
| H    | -5.34913300             | 0.45462400  | 0.96514400  |
| H    | -5.38562700             | 0.59225100  | -0.82054700 |
| H    | -5.38613300             | -1.01567300 | -0.05458400 |

4

Energy = -1675.61483321

| Atom | Coordinates (Angstroms) |             |             |
|------|-------------------------|-------------|-------------|
|      | X                       | Y           | Z           |
| C    | 0.01436700              | 0.92490900  | 0.88438200  |
| C    | 1.33695800              | 0.42715300  | 0.45969000  |
| C    | 1.56987100              | 1.66125500  | -0.30620500 |
| C    | 0.24727200              | 2.15900300  | 0.11847200  |
| O    | -0.90883000             | 0.50035300  | 1.58385800  |
| O    | 2.49306300              | 2.08580600  | -1.00569100 |
| C    | 2.06478500              | -0.73300700 | 0.69163400  |
| C    | 1.70250900              | -1.84483000 | 1.46186900  |
| S    | 3.68405600              | -0.97930900 | -0.00717400 |
| C    | 2.65672000              | -2.85968300 | 1.50502500  |
| H    | 0.74819900              | -1.88138400 | 1.97583700  |
| C    | 3.80466300              | -2.56619400 | 0.74551000  |
| H    | 2.53567400              | -3.77792100 | 2.06433900  |

|   |             |             |             |
|---|-------------|-------------|-------------|
| C | -0.48055700 | 3.31915700  | -0.11349100 |
| C | -0.11827400 | 4.43097300  | -0.88373400 |
| S | -2.09983300 | 3.56546800  | 0.58530400  |
| C | -1.07248800 | 5.44582200  | -0.92691500 |
| H | 0.83604200  | 4.46752200  | -1.39769000 |
| C | -2.22044000 | 5.15233600  | -0.16741200 |
| H | -0.95144000 | 6.36405600  | -1.48623700 |
| N | 4.89115300  | -3.34812100 | 0.56309100  |
| N | -3.30694000 | 5.93425500  | 0.01497300  |
| C | -3.41339400 | 7.18174200  | -0.74003900 |
| H | -3.54840600 | 6.99539200  | -1.81350400 |
| H | -4.27003600 | 7.74509400  | -0.36927900 |
| H | -2.51423400 | 7.78845000  | -0.59726200 |
| C | -4.48286900 | 5.41935400  | 0.70950800  |
| H | -5.14964000 | 6.24960600  | 0.94480600  |
| H | -5.02889300 | 4.68626300  | 0.10020900  |
| H | -4.18708800 | 4.94326400  | 1.65025100  |
| C | 6.06709700  | -2.83320500 | -0.13140900 |
| H | 6.61317000  | -2.10020700 | 0.47795900  |
| H | 6.73382000  | -3.66346800 | -0.36680800 |
| H | 5.77132300  | -2.35700200 | -1.07209600 |
| C | 4.99762600  | -4.59560700 | 1.31810300  |
| H | 5.85421700  | -5.15899100 | 0.94727200  |
| H | 5.13273700  | -4.40925600 | 2.39155600  |
| H | 4.09843400  | -5.20228200 | 1.17540400  |

4-

Energy = -1675.71483628

| Atom | Coordinates (Angstroms) |   |   |
|------|-------------------------|---|---|
|      | X                       | Y | Z |

|   |             |             |             |
|---|-------------|-------------|-------------|
| C | 0.07889200  | 1.00024100  | 0.98442000  |
| C | 1.33247500  | 0.41552100  | 0.46756300  |
| C | 1.50510200  | 1.58564500  | -0.40668800 |
| C | 0.25153600  | 2.17038300  | 0.11019800  |
| O | -0.77866000 | 0.65978200  | 1.81320900  |
| O | 2.36267800  | 1.92612200  | -1.23544700 |
| C | 2.05335700  | -0.76408100 | 0.70225100  |
| C | 1.77934800  | -1.82280900 | 1.56345400  |
| S | 3.59193600  | -1.07925400 | -0.15216100 |
| C | 2.75573600  | -2.85253400 | 1.56256000  |
| H | 0.89320000  | -1.82871000 | 2.18885100  |
| C | 3.80477200  | -2.62561900 | 0.69136900  |
| H | 2.68677000  | -3.73148000 | 2.19252000  |
| C | -0.46927000 | 3.35005500  | -0.12436800 |
| C | -0.19522900 | 4.40882500  | -0.98551100 |
| S | -2.00778300 | 3.66527400  | 0.73014800  |
| C | -1.17153700 | 5.43862600  | -0.98447800 |
| H | 0.69088800  | 4.41471000  | -1.61095100 |
| C | -2.22054400 | 5.21172300  | -0.11325000 |
| H | -1.10253600 | 6.31761900  | -1.61436900 |
| N | 4.86800700  | -3.46249500 | 0.37328300  |
| N | -3.28368400 | 6.04866500  | 0.20498400  |
| C | -3.39428900 | 7.26203200  | -0.59332600 |
| H | -3.62572700 | 7.05883200  | -1.65265900 |

|   |             |             |             |
|---|-------------|-------------|-------------|
| H | -4.18830000 | 7.88749800  | -0.17712000 |
| H | -2.45577400 | 7.82240300  | -0.54722400 |
| C | -4.55824300 | 5.43335900  | 0.56425600  |
| H | -5.22891000 | 6.20724500  | 0.94762600  |
| H | -5.04739900 | 4.93350600  | -0.28814400 |
| H | -4.41118200 | 4.69569000  | 1.35799000  |
| C | 6.14248100  | -2.84710600 | 0.01385000  |
| H | 6.63156600  | -2.34695500 | 0.86611500  |
| H | 6.81325600  | -3.62100100 | -0.36931300 |
| H | 5.99531700  | -2.10967200 | -0.78008500 |
| C | 4.97877000  | -4.67569100 | 1.17183400  |
| H | 5.77287300  | -5.30113000 | 0.75576100  |
| H | 5.21016400  | -4.47224600 | 2.23112900  |
| H | 4.04033500  | -5.23620400 | 1.12582800  |

4+

Energy = -1675.44834474

Atom Coordinates (Angstroms)

|   | X           | Y           | Z           |
|---|-------------|-------------|-------------|
| C | 0.01435700  | 0.90710700  | 0.88318900  |
| C | 1.35635100  | 0.42724300  | 0.45828100  |
| C | 1.56959600  | 1.67917400  | -0.30654200 |
| C | 0.22760600  | 2.15905900  | 0.11840700  |
| O | -0.89688100 | 0.46830800  | 1.57214600  |
| O | 2.48082800  | 2.11798600  | -0.99548700 |
| C | 2.09418300  | -0.70677200 | 0.68405300  |
| C | 1.72014500  | -1.83598100 | 1.46423500  |
| S | 3.71922700  | -0.92997400 | -0.00291200 |
| C | 2.66701400  | -2.82669900 | 1.51391900  |
| H | 0.75756900  | -1.87469300 | 1.96115800  |
| C | 3.84020400  | -2.51478600 | 0.75615600  |
| H | 2.55022300  | -3.75436200 | 2.05770600  |
| C | -0.51015200 | 3.29319000  | -0.10700700 |
| C | -0.13606700 | 4.42268600  | -0.88675600 |
| S | -2.13516900 | 3.51624400  | 0.58012700  |
| C | -1.08284000 | 5.41352700  | -0.93594300 |
| H | 0.82649100  | 4.46153200  | -1.38370500 |
| C | -2.25597300 | 5.10135100  | -0.17823500 |
| H | -0.96602100 | 6.34143300  | -1.47930900 |
| N | 4.90941800  | -3.28987100 | 0.61959900  |
| N | -3.32527100 | 5.87624800  | -0.04106500 |
| C | -3.40385100 | 7.15143600  | -0.77394500 |
| H | -3.31492100 | 6.97922900  | -1.85001400 |
| H | -4.37052600 | 7.60792300  | -0.56864100 |
| H | -2.61217800 | 7.82898800  | -0.44214000 |
| C | -4.49152000 | 5.46372200  | 0.74682400  |
| H | -4.96018300 | 6.35125400  | 1.17322800  |
| H | -5.21549400 | 4.94074700  | 0.11215500  |
| H | -4.18452700 | 4.80932800  | 1.56482700  |
| C | 6.07626400  | -2.87903500 | -0.16821500 |
| H | 6.80434600  | -2.36410600 | 0.46830500  |
| H | 6.53911600  | -3.76663500 | -0.60097500 |
| H | 5.77151700  | -2.21792000 | -0.98154400 |
| C | 4.98785100  | -4.56465700 | 1.35320600  |
| H | 5.95442300  | -5.02137500 | 1.14790200  |
| H | 4.89921700  | -4.39181200 | 2.42919300  |



|   |            |             |            |
|---|------------|-------------|------------|
| H | 4.19601700 | -5.24227000 | 1.02192700 |
|---|------------|-------------|------------|

42+

Energy = -1675.24422143

| Atom | Coordinates (Angstroms) |  |  |
|------|-------------------------|--|--|
|------|-------------------------|--|--|

|   | X           | Y           | Z           |
|---|-------------|-------------|-------------|
| C | -0.02436500 | 0.86946500  | 0.81257900  |
| C | 1.33959600  | 0.38874300  | 0.39996200  |
| C | 1.54814500  | 1.64815500  | -0.38655000 |
| C | 0.18624900  | 2.13121000  | 0.03103100  |
| O | -0.92832500 | 0.43750100  | 1.49334700  |
| O | 2.45141800  | 2.08002600  | -1.06807200 |
| C | 2.08358600  | -0.71264500 | 0.65469400  |
| C | 1.69792500  | -1.82683500 | 1.49644700  |
| S | 3.70393200  | -0.94971800 | -0.02322600 |
| C | 2.63859300  | -2.79244500 | 1.59458600  |
| H | 0.73522200  | -1.84019200 | 1.99386500  |
| C | 3.83954400  | -2.49375500 | 0.82852100  |
| H | 2.53003400  | -3.68448000 | 2.19510300  |
| C | -0.54510100 | 3.24812900  | -0.19026100 |
| C | -0.14168800 | 4.39160100  | -0.98299200 |
| S | -2.16027400 | 3.48293000  | 0.50096900  |
| C | -1.05781500 | 5.38473700  | -1.02124600 |
| H | 0.81761600  | 4.40767100  | -1.48688200 |
| C | -2.26036600 | 5.07508700  | -0.26174200 |
| H | -0.93065600 | 6.30524400  | -1.57379400 |
| N | 4.91642100  | -3.23203700 | 0.74319300  |
| N | -3.31518500 | 5.83645400  | -0.12146400 |
| C | -3.40452700 | 7.20681300  | -0.66062400 |
| H | -4.09234400 | 7.20748100  | -1.51024300 |
| H | -3.79992700 | 7.84893700  | 0.12914600  |
| H | -2.42980500 | 7.57623600  | -0.96459800 |
| C | -4.50353100 | 5.39446600  | 0.63168200  |
| H | -4.38675700 | 5.66826700  | 1.68466900  |
| H | -5.37606300 | 5.90050800  | 0.21857000  |
| H | -4.63980300 | 4.31662800  | 0.53468800  |
| C | 6.09031400  | -2.81466700 | -0.04604500 |
| H | 6.97741900  | -3.26524300 | 0.39857500  |
| H | 5.97698500  | -3.16847800 | -1.07534200 |
| H | 6.19816400  | -1.72943800 | -0.02973500 |
| C | 5.05456800  | -4.54716500 | 1.39793300  |
| H | 5.47754600  | -5.24032200 | 0.66826600  |
| H | 5.73932400  | -4.44581800 | 2.24439900  |
| H | 4.09432100  | -4.92628400 | 1.73469500  |

5

Energy = -1296.24791922

| Atom | Coordinates (Angstroms) |  |  |
|------|-------------------------|--|--|
|------|-------------------------|--|--|

|   | X           | Y           | Z           |
|---|-------------|-------------|-------------|
| C | -4.51895200 | -0.33810100 | -1.14841500 |

|   |             |             |             |
|---|-------------|-------------|-------------|
| C | -5.23886100 | -0.01692000 | 0.00413900  |
| C | -4.51433800 | 0.30914700  | 1.15615600  |
| C | -3.11636600 | 0.32078800  | 1.16891100  |
| C | -2.39312100 | -0.00955200 | -0.00234000 |
| C | -3.11799000 | -0.34291300 | -1.16791300 |
| C | -2.39403600 | -0.71130500 | -2.44706500 |
| C | -2.38618000 | 0.69167200  | 2.44371800  |
| B | -0.79860500 | -0.00449200 | -0.00436400 |
| C | -0.09160700 | 1.35257000  | -0.32304300 |
| C | -0.08161700 | -1.35625600 | 0.31394700  |
| C | 1.30672600  | 1.65398700  | -0.09786700 |
| C | 1.64768100  | 3.01692000  | -0.07387400 |
| C | 0.76504600  | 4.09129000  | -0.37801600 |
| C | -0.53832900 | 3.78893100  | -0.70632100 |
| C | -0.93535000 | 2.43322800  | -0.64004300 |
| C | 2.40671400  | 0.74094200  | 0.13519900  |
| C | 3.62234200  | 1.29432100  | 0.57392000  |
| C | 3.89736900  | 2.67738000  | 0.65833700  |
| C | 2.90906800  | 3.55865800  | 0.27917400  |
| C | -0.91803100 | -2.44478100 | 0.62348700  |
| C | -0.51010800 | -3.79731600 | 0.68845300  |
| C | 0.79780100  | -4.08782300 | 0.36771500  |
| C | 1.67320300  | -3.00532200 | 0.07151100  |
| C | 1.32048500  | -1.64538700 | 0.09595900  |
| C | 2.94143800  | -3.53565200 | -0.27420700 |
| C | 3.92473900  | -2.64530500 | -0.64502400 |
| C | 3.63722600  | -1.26482900 | -0.56033000 |
| C | 2.41399500  | -0.72254600 | -0.12890300 |
| C | -6.75035400 | -0.02175500 | 0.01474600  |
| C | 1.57543600  | -5.32384000 | 0.21650400  |
| C | 2.83902100  | -4.99751200 | -0.17477300 |
| C | 1.53119600  | 5.33416100  | -0.22433200 |
| C | 2.79487500  | 5.01939000  | 0.17605100  |
| H | -5.05970100 | -0.59392400 | -2.05831400 |
| H | -5.05189100 | 0.56343300  | 2.06881100  |
| H | -1.69018000 | 0.07236600  | -2.75422700 |
| H | -1.80965400 | -1.63237900 | -2.32643600 |
| H | -3.09701000 | -0.86947500 | -3.27129300 |
| H | -3.08552600 | 0.85857400  | 3.26929200  |
| H | -1.79614700 | 1.60814300  | 2.31618400  |
| H | -1.68636400 | -0.09500300 | 2.75260400  |
| H | -1.26650200 | 4.55529400  | -0.96013600 |
| H | -1.98511100 | 2.21827200  | -0.80746100 |
| H | 4.41496600  | 0.61544100  | 0.86605800  |
| H | 4.87422400  | 3.00850400  | 1.00187400  |
| H | -1.97048700 | -2.23914100 | 0.78555500  |
| H | -1.23332600 | -4.57043700 | 0.93585300  |
| H | 4.90668900  | -2.96744700 | -0.98250700 |
| H | 4.42577000  | -0.57876600 | -0.84660300 |
| H | -7.15576900 | -0.26815700 | -0.97190600 |
| H | -7.15344200 | 0.95602000  | 0.30717100  |
| H | -7.14471200 | -0.75539400 | 0.72948500  |
| H | 1.19109400  | -6.32270500 | 0.38680400  |
| H | 3.64619000  | -5.69074500 | -0.38237800 |
| H | 1.13957800  | 6.32938700  | -0.39930300 |
| H | 3.59471100  | 5.71990100  | 0.38757600  |

Energy = -1862.81378333

**Atom** **Coordinates (Angstroms)**

|   | <b>X</b>    | <b>Y</b>    | <b>Z</b>    |
|---|-------------|-------------|-------------|
| C | 3.90286200  | 7.88863900  | 6.82717100  |
| C | 2.76706400  | 9.92010700  | 7.51500600  |
| C | 1.81801500  | 10.71409000 | 8.16580500  |
| H | 1.83725600  | 11.79479000 | 8.05971100  |
| C | 0.85503700  | 10.08864900 | 8.94603500  |
| H | 0.10558800  | 10.68176300 | 9.46236800  |
| C | 0.85529700  | 8.69021000  | 9.06217700  |
| H | 0.10045700  | 8.20184200  | 9.67218600  |
| C | 1.80331900  | 7.91045400  | 8.41158100  |
| H | 1.76155700  | 6.83977100  | 8.53023400  |
| C | 2.80550900  | 8.50230800  | 7.60602200  |
| C | 4.63420700  | 8.90207200  | 6.18165500  |
| C | 5.76219900  | 8.87263000  | 5.31826100  |
| H | 6.10714300  | 9.84378000  | 4.96999000  |
| C | 6.47470900  | 7.80527500  | 4.85894900  |
| H | 7.30278400  | 8.05152000  | 4.19793900  |
| C | 6.29522900  | 6.41992400  | 5.11867100  |
| C | 6.76763200  | 3.95870600  | 4.97663900  |
| C | 7.22523500  | 2.65909500  | 4.73921700  |
| H | 8.07752900  | 2.48491100  | 4.08906300  |
| C | 6.56581300  | 1.60279400  | 5.35287300  |
| H | 6.90073800  | 0.58305100  | 5.18548200  |
| C | 5.46825100  | 1.85987600  | 6.18853800  |
| H | 4.95362800  | 1.03245400  | 6.66910600  |
| C | 5.02141300  | 3.15520900  | 6.41758600  |
| H | 4.17460500  | 3.30252200  | 7.06823700  |
| C | 5.65997400  | 4.26430600  | 5.81305200  |
| C | 5.36828400  | 5.71134800  | 5.90428100  |
| C | 3.27697800  | 5.37688100  | 7.56618200  |
| C | 3.59445100  | 5.03858700  | 8.90144200  |
| C | 2.75932800  | 4.17705700  | 9.62185700  |
| H | 3.01659900  | 3.92995600  | 10.65076100 |
| C | 1.60328200  | 3.62739800  | 9.05663800  |
| C | 1.29518200  | 3.97069300  | 7.73572300  |
| H | 0.39695600  | 3.56110700  | 7.27608000  |
| C | 2.10921900  | 4.82944300  | 6.98810400  |
| C | 4.83317200  | 5.60419000  | 9.56418300  |
| H | 4.93123800  | 5.24752600  | 10.59450100 |
| H | 4.81023900  | 6.70102000  | 9.59140600  |
| H | 5.74470600  | 5.31762800  | 9.02428800  |
| C | 1.72557900  | 5.16837200  | 5.56278000  |
| H | 0.80080400  | 4.66174900  | 5.26871400  |
| H | 2.50879500  | 4.87093900  | 4.85395300  |
| H | 1.57054500  | 6.24709700  | 5.43282900  |
| B | 4.21328100  | 6.35858600  | 6.73647100  |
| S | 4.03998600  | 10.53523800 | 6.49703400  |
| S | 7.47506400  | 5.39671800  | 4.29334500  |
| C | 0.72914600  | 2.67464600  | 9.83941200  |
| H | 1.06689300  | 1.63586400  | 9.72305400  |
| H | 0.74800900  | 2.90137800  | 10.91093500 |
| H | -0.31163400 | 2.71576700  | 9.50063900  |

7

Energy = -1222.22290033

| Atom | Coordinates (Angstroms) |             |             |
|------|-------------------------|-------------|-------------|
|      | X                       | Y           | Z           |
| C    | -2.96801700             | -2.47517500 | -0.70508100 |
| C    | -2.63052000             | -0.43681200 | 0.50315200  |
| C    | -1.29028600             | -0.57798100 | 0.39513500  |
| C    | -0.68851800             | -1.72906000 | -0.29247700 |
| C    | -1.63665100             | -2.67695600 | -0.83649100 |
| H    | -3.70409700             | -3.16586500 | -1.10130000 |
| H    | -3.09761200             | 0.39236900  | 1.02544400  |
| H    | -1.29750000             | -3.56427700 | -1.36280000 |
| C    | 1.29021100              | -0.57853500 | 0.39479400  |
| C    | 2.63053100              | -0.43797600 | 0.50251300  |
| C    | 2.96683700              | -2.47643100 | -0.70588500 |
| C    | 1.63534800              | -2.67760900 | -0.83700100 |
| C    | 0.68777100              | -1.72933700 | -0.29268500 |
| H    | 3.09811800              | 0.39098100  | 1.02471800  |
| H    | 3.70251100              | -3.16741600 | -1.10234400 |
| H    | 1.29568000              | -3.56472900 | -1.36331500 |
| C    | 0.00030400              | 2.05432400  | 0.09571200  |
| C    | 0.00284500              | 3.27649800  | 0.77878400  |
| C    | -0.00208000             | 2.04580100  | -1.30707400 |
| C    | 0.00305800              | 4.47836800  | 0.06704500  |
| H    | 0.00448500              | 3.26740800  | 1.86484200  |
| C    | -0.00186100             | 3.24649600  | -2.01547700 |
| H    | -0.00412300             | 1.10049000  | -1.84406300 |
| C    | 0.00071300              | 4.46422200  | -1.32847200 |
| H    | 0.00500700              | 5.42446600  | 0.60239200  |
| H    | -0.00372200             | 3.23442500  | -3.10245900 |
| H    | 0.00085800              | 5.39962600  | -1.88243000 |
| P    | 0.00028100              | 0.50776900  | 1.07946100  |
| O    | 0.00072400              | 0.81426700  | 2.55244700  |
| N    | 3.50492900              | -1.35247600 | -0.06407200 |
| N    | -3.50546100             | -1.35091800 | -0.06323100 |
| C    | -4.92263300             | -1.31452000 | 0.25441000  |
| H    | -5.22264600             | -0.28346800 | 0.45948600  |
| H    | -5.50411300             | -1.67469200 | -0.60057100 |
| H    | -5.17170100             | -1.93117700 | 1.13082300  |
| C    | 4.92218200              | -1.31673800 | 0.25328000  |
| H    | 5.50331200              | -1.67723300 | -0.60180200 |
| H    | 5.22273200              | -0.28581900 | 0.45823800  |
| H    | 5.17113200              | -1.93346900 | 1.12967400  |
